# Supplementary material for: Isomorphic coordination polymers of cobalt(ii), zinc(ii) with a flexible ligand of cis,cis,cis-1,2,3,4-cyclopentanetetracarboxylic acid and their molecular alloys: crystal structures, thermal decomposition mechanisms and magnetic properties
Source: Royal Society of Chemistry journal article supplement (doi:10.1039/c0dt01230k), 2011-01-01
Supplement: c0dt01230k.pdf [file c0dt01230k.pdf]

## Supplementary materials

**Isomorphous coordination polymers of Cobalt(II), Zinc(II) with a flexible ligand of cis, cis, cis-1, 2, 3, 4-cyclopentanetetracarboxylic acid and their molecular alloy: crystal structures, thermal decomposition mechanisms and magnetic properties**

Liang-Fang Huang, Chang-Chun Ji, Zhen-Zhong Lu, Xiao-Qiang Yao, Jin-Song Hu and He-Gen Zheng\*

*State Key Laboratory of Coordination Chemistry, School of Chemistry and Chemical Engineering, Nanjing National Laboratory of Microstructures, Nanjing University, Nanjing 210093, P. R. China*

E-mail: zhenghg@nju.edu.cn

**Fig. S1** Neighboring three-nuclear unit to form a chain by carboxylate along the *b*-axis direction and packing diagram of 3D supramolecular framework in **2** (dotted lines show hydrogen bonds).

**Fig. S2** Neighboring three-nuclear unit to form a chain by carboxylate along the *b*-axis direction and packing diagram of 3D supramolecular framework in **3** (dotted lines show hydrogen bonds).

**Fig. S3** XPS spectra of Zn 2p and Co 2p for complex **3**.

**Fig. S4** (a) EDS spectra for complex **3** (b) Typical SEM image from complex **3**.

**Fig. S5** Experimental (bottom) and simulated (top) powder X-ray diffraction patterns of complex **1** at 293K.

**Fig. S6** Experimental (bottom) and simulated (top) powder X-ray diffraction patterns of complex **2** at 293K.

**Fig. S7** Experimental (bottom) and simulated (top) powder X-ray diffraction patterns of complex **3** at 293K.

**Fig. S8** Temperature dependence of  $\chi_{MT}$  for **1** (inset: plot of  $\chi_M^{-1}$  versus *T*, open circles and red line represent experimental data and fits).

**Fig. S9** Temperature dependence of  $\chi_{MT}$  for **3** (open circles represent experimental data).

**Table S1** Selected bond lengths (Å) and bond angles (°) for **1**, **2** and **3**.

**Table S2** XPS peak table of complex **3**.

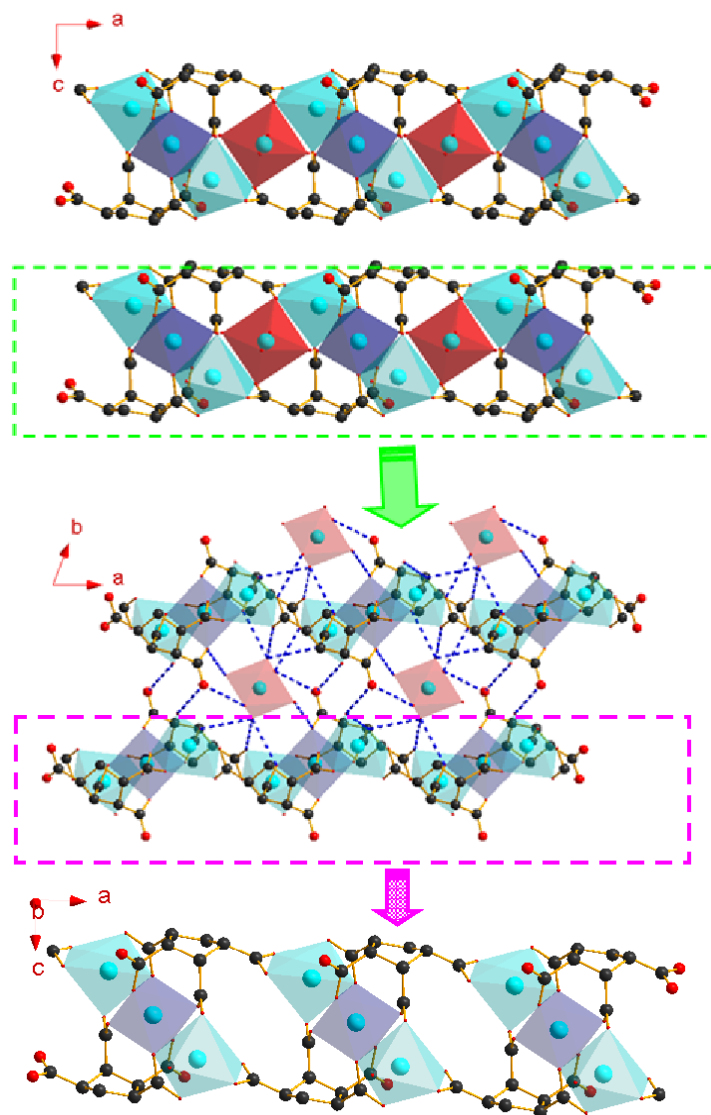

**Fig. S1** Neighboring three-nuclear unit to form a chain by carboxylate along the *b*-axis direction and packing diagram of 3D supramolecular framework in **2** (dotted lines show hydrogen bonds).

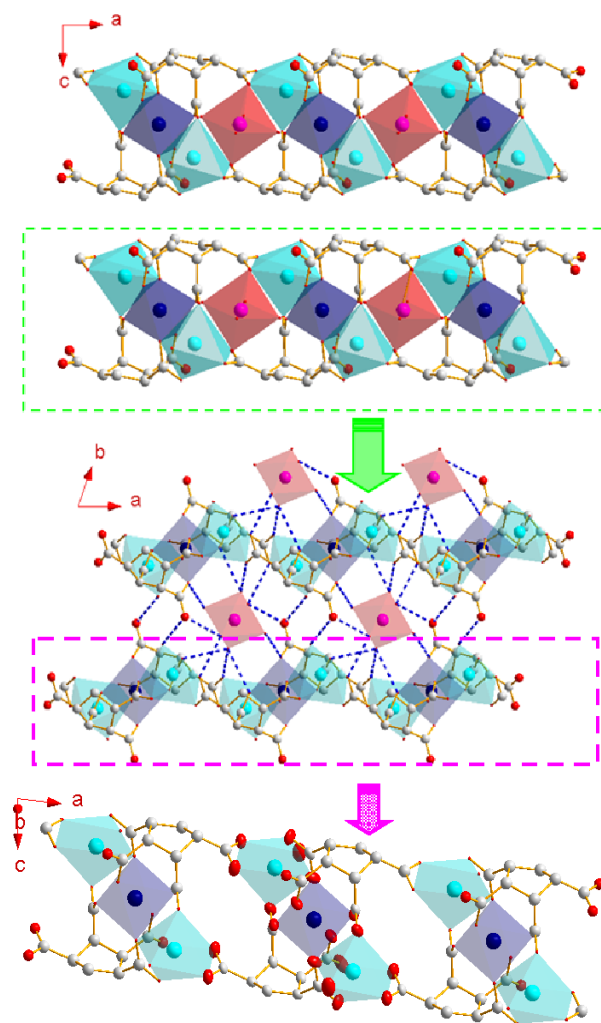

**Fig. S2** Neighboring three-nuclear unit to form a chain by carboxylate along the *b*-axis direction and packing diagram of 3D supramolecular framework in **3** (dotted lines show hydrogen bonds).

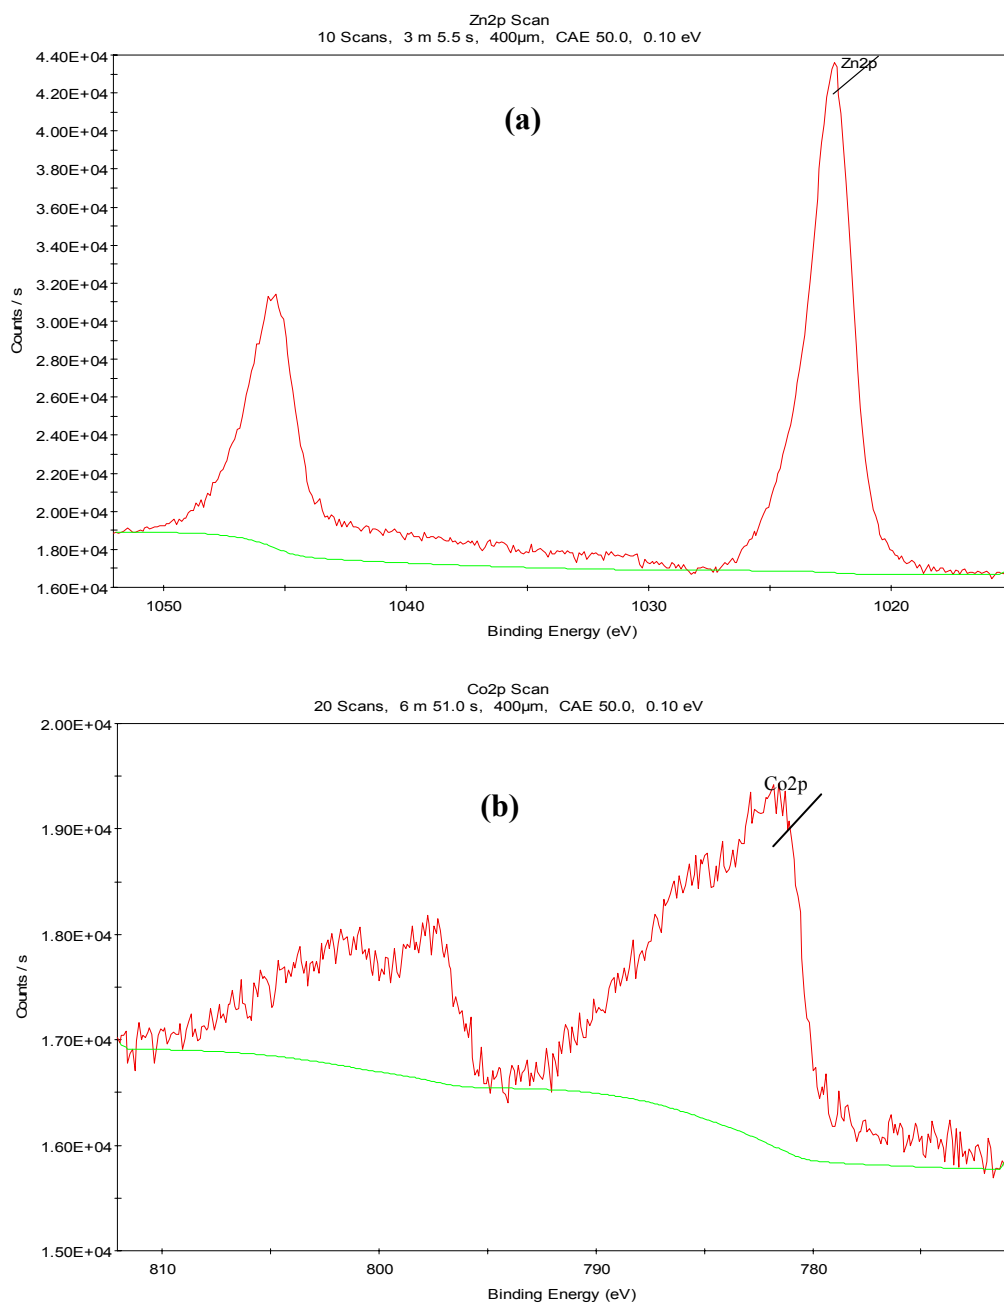

**Fig. S3** XPS spectra of Zn 2p and Co 2p for complex **3**.

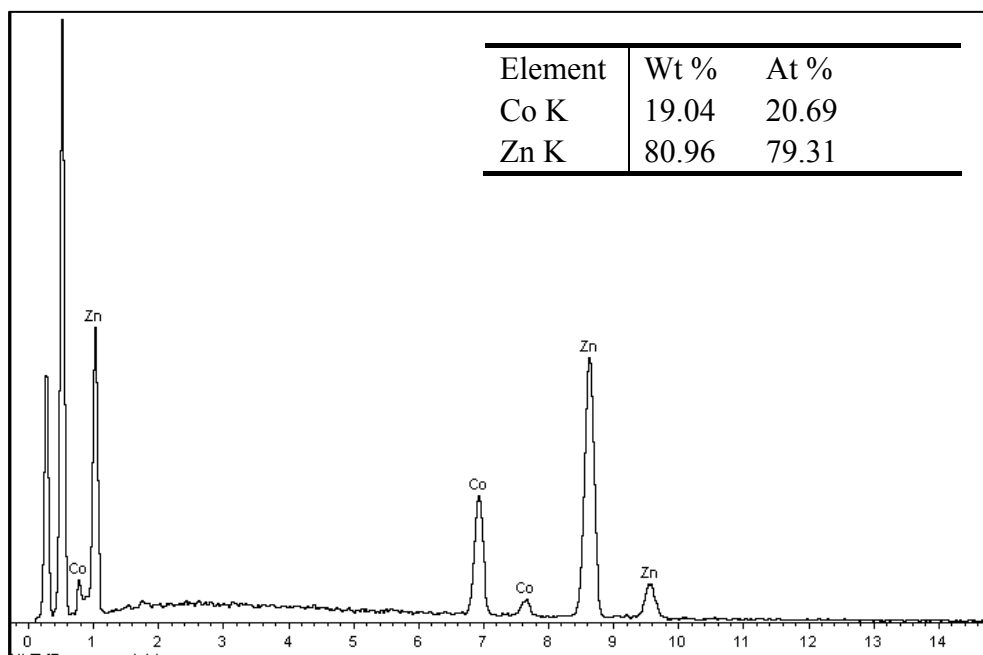

(a)

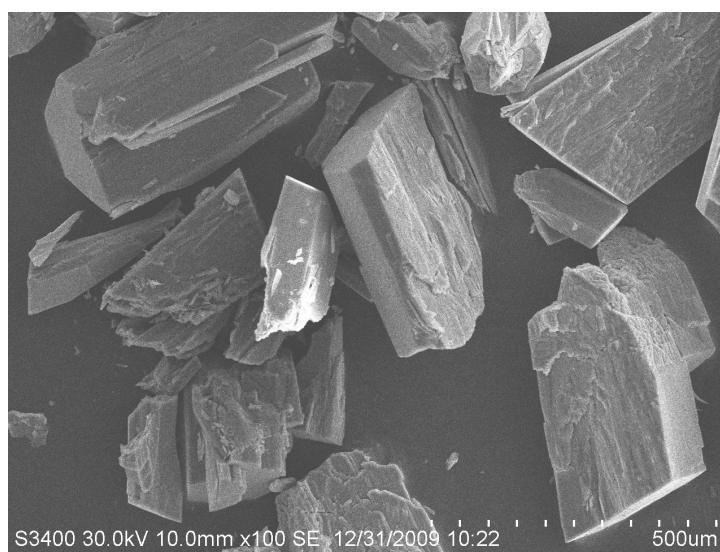

(b)

**Fig. S4** (a) EDS spectra for complex **3** (b) Typical SEM image from complex **3**.

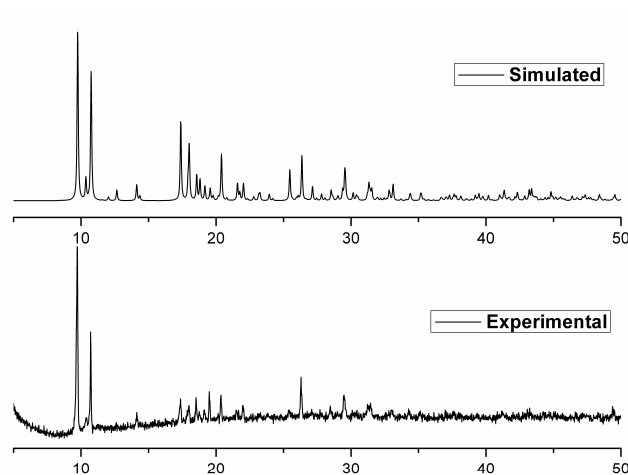

**Fig. S5** Experimental (bottom) and simulated (top) powder X-ray diffraction patterns of complex **1** at 293K.

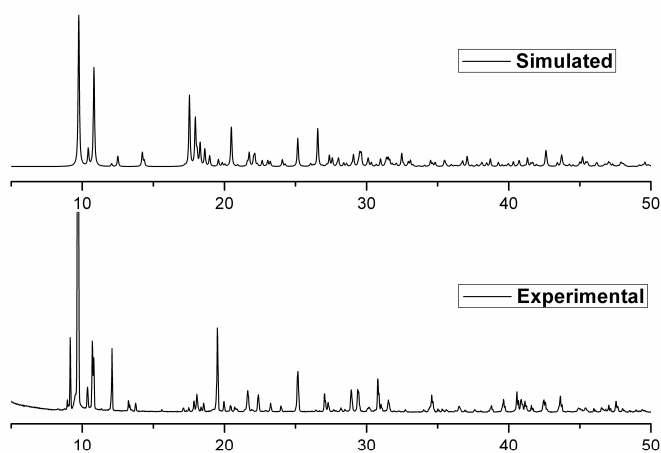

**Fig. S6** Experimental (bottom) and simulated (top) powder X-ray diffraction patterns of complex **2** at 293K.

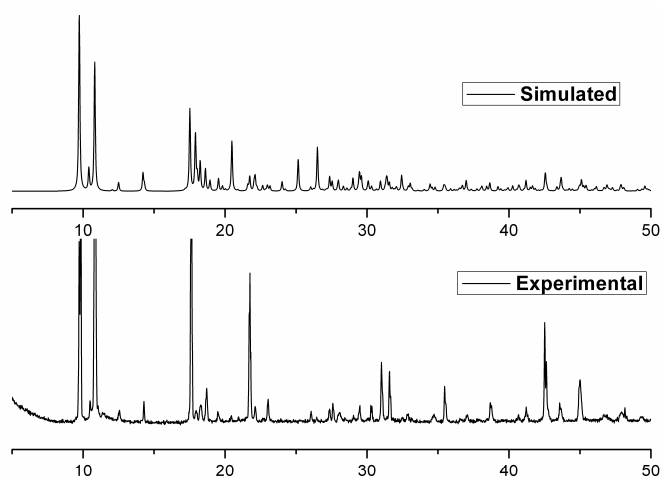

**Fig. S7** Experimental (bottom) and simulated (top) powder X-ray diffraction patterns of complex **3** at 293K.

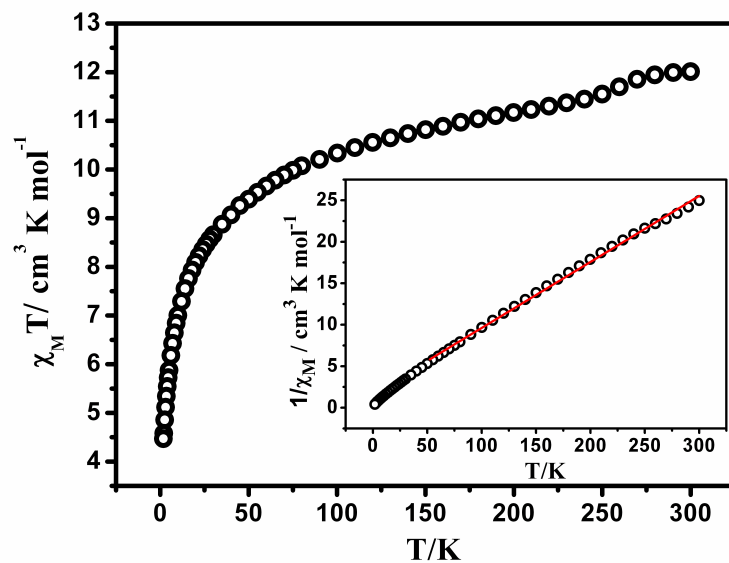

**Fig. S8** Temperature dependence of  $\chi_M T$  for **1** (inset: plot of  $\chi_M^{-1}$  versus  $T$ , open circles and red line represent experimental data and fits).

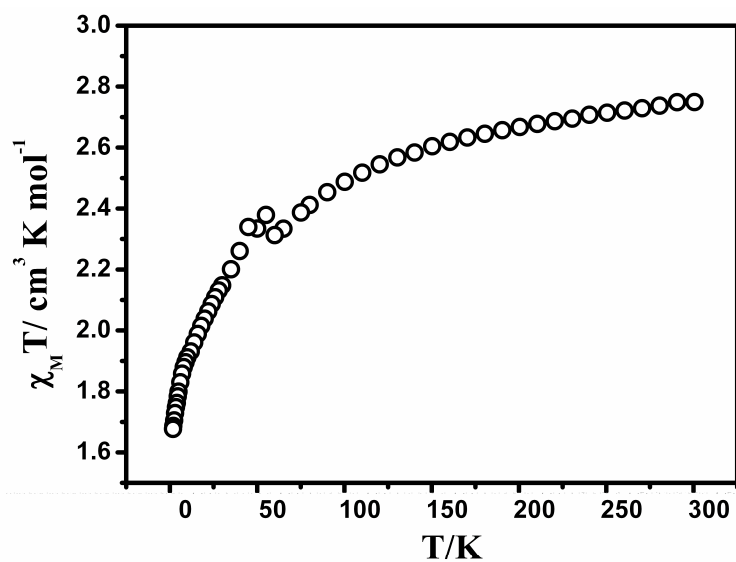

**Fig. S9** Temperature dependence of  $\chi_M T$  for **3** (open circles represent experimental data).



**Table S1** Selected bond lengths (Å) and angles (°) for complexes **1**, **2** and **3**

| Complex 1   |            |                |             |
|-------------|------------|----------------|-------------|
| Co1-O7      | 2.056(3)   | Co2-O9         | 2.067(3)    |
| Co1-O8      | 2.061(3)   | Co2-O3         | 2.070(3)    |
| Co1-O6      | 2.113(3)   | Co3-O12        | 2.071(3)    |
| Co1-O4      | 2.161(3)   | Co3-O10        | 2.074(3)    |
| Co1-O3      | 2.197(3)   | Co3-O11        | 2.079(3)    |
| Co1-O5      | 2.197(3)   | O2-Co2-O9      | 89.93(11)   |
| O7-Co1-O8   | 93.38(14)  | O2-Co2-O9#1    | 90.07(11)   |
| O7-Co1-O6   | 100.61(12) | O9-Co2-O9#1    | 180.0 2_766 |
| O8-Co1-O6   | 92.17(12)  | O2-Co2-O3      | 90.65(11)   |
| O7-Co1-O4   | 156.46(12) | O2-Co2-O3#1    | 89.35(11)   |
| O8-Co1-O4   | 95.81(13)  | O9-Co2-O3      | 85.28(11)   |
| O6-Co1-O4   | 100.65(12) | O9-Co2-O3#1    | 94.72(11)   |
| O7-Co1-O3   | 100.01(11) | O3-Co2-O3#1    | 180.000(1)  |
| O8-Co1-O3   | 85.74(12)  | O12-Co3-O12#3  | 180.0 2_656 |
| O6-Co1-O3   | 159.36(11) | O12-Co3-O10    | 89.13(14)   |
| O4-Co1-O3   | 59.27(10)  | O12-Co3-O10#3  | 90.87(14)   |
| O7-Co1-O5   | 96.68(13)  | O10-Co3- O10#3 | 180.0       |
| O8-Co1-O5   | 151.86(12) | O10-Co3- O11   | 92.72(13)   |
| O6-Co1-O5   | 60.19(11)  | O10-Co3- O11#3 | 87.28(13)   |
| O4-Co1-O5   | 85.23(12)  | O12-Co3- O11   | 90.67(14)   |
| O3-Co1-O5   | 118.01(11) | O12-Co3- O11#3 | 89.33(14)   |
| O2-Co2-O2#1 | 180.00(16) | O11-Co3- O11#3 | 180.0       |
| Co2-O2      | 2.060(3)   |                |             |
| Complex 2   |            |                |             |
| Zn1-O7      | 2.017(3)   | Zn2-O2         | 2.035(3)    |
| Zn1-O8      | 2.067(3)   | Zn2-O9         | 2.081(3)    |
| Zn1-O6      | 2.094(3)   | Zn2-O3         | 2.097(3)    |
| Zn1-O4      | 2.211(3)   | Zn3-O12        | 2.065(3)    |
| Zn1-O3      | 2.217(3)   | Zn3-O10        | 2.096(3)    |
| Zn1-O5      | 2.247(3)   | Zn3-O11        | 2.091(3)    |
| O7-Zn1-O8   | 93.38(13)  | O2-Zn2-O9#1    | 88.93(10)   |
| O7-Zn1-O6   | 108.59(11) | O9-Zn2-O9#1    | 180.00(14)  |
| O8-Zn1-O6   | 91.64(12)  | O2-Zn2-O3      | 88.73(11)   |
| O7-Zn1-O4   | 152.32(11) | O2-Zn2-O3#1    | 91.27(11)   |
| O8-Zn1-O4   | 98.07(13)  | O9-Zn2-O3      | 86.05(10)   |
| O6-Zn1-O4   | 96.18(11)  | O9-Zn2-O3#1    | 93.95(10)   |
| O7-Zn1-O3   | 96.94(10)  | O3-Zn2-O3#1    | 180.000(1)  |
| O8-Zn1-O3   | 89.18(11)  | O12-Zn3-O12#3  | 180.000(1)  |
| O6-Zn1-O3   | 154.35(10) | O12-Zn3-O10    | 88.57(12)   |
| O4-Zn1-O3   | 58.37(10)  | O12-Zn3-O10#3  | 91.43(12)   |
| O7-Zn1-O5   | 96.44(11)  | O10-Zn3- O10#3 | 180.0       |
| O8-Zn1-O5   | 151.39(12) | O10-Zn3- O11   | 87.56(12)   |

|                  |            |                |           |
|------------------|------------|----------------|-----------|
| O6-Zn1-O5        | 59.76(10)  | O11-Zn3- O10#3 | 92.44(12) |
| O4-Zn1-O5        | 85.29(11)  | O11-Zn3- O11#3 | 180.0     |
| O3-Zn1-O5        | 116.02(11) | O12-Zn3- O11   | 91.07(12) |
| O2-Zn2-O2#1      | 180.00(16) | O12-Zn3- O11#3 | 88.93(12) |
| O2-Zn2-O9        | 91.07(10)  |                |           |
| <b>Complex 3</b> |            |                |           |
| Zn1-O7           | 2.016(4)   | Co2-O2         | 2.042(4)  |
| Zn1-O8           | 2.059(4)   | Co2-O9         | 2.078(4)  |
| Zn1-O6           | 2.109(4)   | Co2-O3         | 2.081(4)  |
| Zn1-O4           | 2.203(5)   | Co3-O12        | 2.068(4)  |
| Zn1-O3           | 2.216(4)   | Co3-O10        | 2.102(4)  |
| Zn1-O5           | 2.248(5)   | Co3-O11        | 2.088(4)  |
| O7-Zn1-O8        | 93.7(2)    | O2-Co2-O9#1    | 89.07(15) |
| O7-Zn1-O6        | 108.36(16) | O9-Co2-O9#1    | 180.00(5) |
| O8-Zn1-O6        | 91.18(17)  | O2-Co2-O3      | 88.79(16) |
| O7-Zn1-O4        | 152.64(16) | O2-Co2-O3#1    | 91.21(16) |
| O8-Zn1-O4        | 97.9(2)    | O9-Co2-O3      | 85.89(15) |
| O6-Zn1-O4        | 96.15(16)  | O9-Co2-O3#1    | 94.11(15) |
| O7-Zn1-O3        | 97.01(15)  | O3-Co2-O3#1    | 180.0     |
| O8-Zn1-O3        | 89.88(17)  | O12-Co3-O12#3  | 180.0     |
| O6-Zn1-O3        | 154.48(16) | O12-Co3-O10    | 91.13(17) |
| O4-Zn1-O3        | 58.47(15)  | O12-Co3-O10#3  | 88.87(17) |
| O7-Zn1-O5        | 96.31(17)  | O10-Co3- O10#3 | 180.0     |
| O8-Zn1-O5        | 151.07(17) | O10-Co3- O11   | 92.76(17) |
| O6-Zn1-O5        | 59.90(15)  | O10-Co3- O11#3 | 87.24(17) |
| O4-Zn1-O5        | 85.41(18)  | O11-Co3- O11#3 | 180.0     |
| O3-Zn1-O5        | 115.62(17) | O12-Co3- O11#3 | 91.48(18) |
| O2-Co2-O2#1      | 180.0      | O12-Co3- O11   | 88.52(18) |
| O2-Co2-O9        | 90.93(15)  |                |           |

**Symmetry codes :** #1 = 2-x, 1-y, 1-z; #2 = -1+x, y, z; #3 = 1-x, -y, 1-z; #4 = 1+x, y, z.

**Table S2** XPS Peak table of complex 3

| Name | Start BE | Peak BE | End BE  | PP Hgt (N) | PP At. % |
|------|----------|---------|---------|------------|----------|
| C1s  | 297.98   | 285.13  | 279.18  | 33.56      | 46.49    |
| O1s  | 544.98   | 532.05  | 525.18  | 22.95      | 31.78    |
| Co2p | 811.98   | 781.62  | 771.18  | 3.82       | 5.29     |
| Zn2p | 1051.98  | 1022.41 | 1015.18 | 11.87      | 16.44    |
